# Supplementary material for: Impact of Substance Disorders on Medical Expenditures for Medicaid Beneficiaries With Behavioral Health Disorders
Source: Atypon-hosted journal article supplement (doi:10.1176/ps.2009.60.1.35), 2009-01-01
Supplement: pss_60_01_035_01.pdf [file pss_60_01_035_01.pdf]

**Supplemental Table 1 (with Ns and percentages): Characteristics of Medicaid beneficiaries with mental disorders in six states, by whether or not they had a co-occurring substance use disorder (SUD)**

|                                       | AR                           |                            | CO                          |                            | GA                           |                            | IN                           |                            | NJ                           |                             | WA                           |                             |
|---------------------------------------|------------------------------|----------------------------|-----------------------------|----------------------------|------------------------------|----------------------------|------------------------------|----------------------------|------------------------------|-----------------------------|------------------------------|-----------------------------|
|                                       | No SUD<br>N=12,079<br>N<br>% | + SUD<br>N=2,329<br>N<br>% | No SUD<br>N=5,948<br>N<br>% | + SUD<br>N=2,354<br>N<br>% | No SUD<br>N=26,680<br>N<br>% | + SUD<br>N=9,526<br>N<br>% | No SUD<br>N=21,907<br>N<br>% | + SUD<br>N=5,758<br>N<br>% | No SUD<br>N=19,902<br>N<br>% | + SUD<br>N=11,746<br>N<br>% | No SUD<br>N=18,257<br>N<br>% | + SUD<br>N=11,971<br>N<br>% |
| <b>Age</b>                            |                              |                            |                             |                            |                              |                            |                              |                            |                              |                             |                              |                             |
| 22-44                                 | 7,995<br>66.2                | 1,649<br>70.8              | 3,873<br>65.1               | 1,594<br>67.7              | 17,444<br>65.4               | 6,548<br>68.7              | 15,780<br>72.0               | 4,293<br>74.6              | 12,551<br>63.1               | 9,158<br>78.0               | 11771<br>64.5                | 9154<br>76.5                |
| 45-64                                 | 4,084<br>33.8                | 680 <sup>c</sup><br>29.2   | 2,075<br>34.9               | 760 <sup>a</sup><br>32.3   | 9,236<br>34.6                | 2,978 <sup>c</sup><br>31.3 | 6,127<br>28.0                | 1,465 <sup>c</sup><br>25.4 | 7,351<br>36.9                | 2,588 <sup>c</sup><br>22.0  | 6486<br>35.5                 | 2817 <sup>c</sup><br>23.5   |
| <b>Gender</b>                         |                              |                            |                             |                            |                              |                            |                              |                            |                              |                             |                              |                             |
| Male                                  | 2,967<br>24.6                | 1,002<br>43.0              | 1,478<br>24.9               | 1,078<br>45.8              | 5,690<br>21.3                | 3,474<br>36.5              | 4,741<br>21.6                | 2,308<br>40.1              | 5,467<br>27.5                | 3,747<br>31.9               | 5330<br>29.2                 | 4469<br>37.3                |
| Female                                | 9,108<br>75.4                | 1,327 <sup>c</sup><br>57.0 | 4,470<br>75.1               | 1,276 <sup>c</sup><br>54.2 | 20,990<br>78.7               | 6,052 <sup>c</sup><br>63.5 | 17,166<br>78.4               | 3,450 <sup>c</sup><br>59.9 | 14,435<br>72.5               | 7,999 <sup>c</sup><br>68.1  | 12923<br>70.8                | 7501 <sup>c</sup><br>62.7   |
| <b>Race</b>                           |                              |                            |                             |                            |                              |                            |                              |                            |                              |                             |                              |                             |
| White                                 | 7,893<br>65.3                | 1,354<br>58.1              | 3,695<br>62.1               | 1,281<br>54.4              | 12,421<br>46.6               | 3,417<br>35.9              | 18,013<br>82.2               | 4,109<br>71.4              | 9,255<br>46.5                | 3,383<br>28.8               | 14245<br>78.0                | 8929<br>74.6                |
| Hispanic                              | 218<br>1.8                   | 44<br>1.9                  | 1,271<br>21.4               | 598<br>25.4                | 116<br>0.4                   | 26<br>0.3                  | 446<br>2.0                   | 119<br>2.1                 | 2,262<br>11.4                | 979<br>8.3                  | 917<br>5.0                   | 654<br>5.5                  |
| African American                      | 3,523<br>29.2                | 855<br>36.7                | 296<br>5.0                  | 180<br>7.7                 | 11,497<br>43.1               | 5,454<br>57.3              | 3,288<br>15.0                | 1,494<br>26.0              | 5,304<br>26.7                | 6,463<br>55.0               | 1056<br>5.9                  | 1176<br>9.8                 |
| Other race / missing                  | 445<br>3.7                   | 76 <sup>c</sup><br>3.3     | 686<br>11.5                 | 295 <sup>c</sup><br>12.5   | 2,64<br>9.9                  | 629 <sup>c</sup><br>6.6    | 160<br>0.7                   | 36 <sup>c</sup><br>0.6     | 3,081<br>15.5                | 921 <sup>c</sup><br>7.8     | 2039<br>11.1                 | 1212 <sup>c</sup><br>10.1   |
| <b>Disabled</b>                       | 8,819<br>73.0                | 1703<br>73.1               | 4,020<br>67.6               | 1,565<br>66.5              | 17,820<br>66.8               | 5,684 <sup>c</sup><br>59.7 | 13,210<br>60.3               | 3,415<br>59.3              | 13,942<br>70.1               | 5,927 <sup>c</sup><br>50.5  | 12870<br>70.5                | 5658 <sup>c</sup><br>47.3   |
| <b>Fee For Service</b>                | 10,807<br>89.5               | 2,028 <sup>c</sup><br>87.1 | 44<br>0.7                   | 23<br>1.0                  | 2,632<br>9.9                 | 918<br>9.6                 | 11,625<br>53.1               | 3,062<br>53.2              | 13,087<br>65.8               | 5,514 <sup>c</sup><br>46.9  | 12289<br>67.3                | 5488 <sup>c</sup><br>45.8   |
| <b>Continuity of coverage, months</b> |                              |                            |                             |                            |                              |                            |                              |                            |                              |                             |                              |                             |
| < 6                                   | 1,271<br>10.5                | 301<br>12.9                | 823<br>13.8                 | 617<br>26.2                | 3,296<br>12.4                | 1,506<br>15.8              | 2,571<br>11.7                | 1,005<br>17.5              | 1,790<br>9.0                 | 1,629<br>13.9               | 2535<br>13.9                 | 2391<br>20.0                |
| 7-11                                  | 1,639                        | 361                        | 1,032                       | 526                        | 4,020                        | 1,862                      | 4,615                        | 1,555                      | 2,497                        | 2,172                       | 3093                         | 2989                        |

|                               |                       |                                    |                       |                                    |                             |                                    |                        |                                    |                        |                                    |                        |                                    |
|-------------------------------|-----------------------|------------------------------------|-----------------------|------------------------------------|-----------------------------|------------------------------------|------------------------|------------------------------------|------------------------|------------------------------------|------------------------|------------------------------------|
| 12                            | 13.6<br>9,169<br>75.9 | 15.5<br>1,667 <sup>b</sup><br>71.6 | 17.4<br>4,093<br>68.8 | 22.3<br>1,211 <sup>c</sup><br>51.4 | 15.0<br>19,364<br>72.6      | 19.6<br>6,158 <sup>c</sup><br>64.6 | 21.1<br>14,721<br>67.2 | 27.0<br>3,198 <sup>c</sup><br>55.5 | 12.5<br>15,615<br>78.5 | 18.5<br>7,945 <sup>c</sup><br>67.6 | 16.9<br>12,629<br>69.2 | 25.0<br>6,591 <sup>c</sup><br>55.0 |
| <b>Physical Comorbidities</b> | 6,919<br>57.3         | 1,298 <sup>c</sup><br>55.7         | 3,069<br>51.6         | 1,216<br>51.7                      | 15,702<br>58.9              | 5,747 <sup>b</sup><br>60.3         | 12,920<br>59.0         | 3,293 <sup>b</sup><br>57.2         | 10,896<br>54.8         | 5,958 <sup>c</sup><br>50.7         | 9,123<br>50.0          | 5,094 <sup>c</sup><br>42.6         |
| <b>Severe MI</b>              | 8,028<br>66.5         | 1,161 <sup>c</sup><br>49.9         | 4,097<br>68.9         | 722<br>30.7                        | 18,361 <sup>c</sup><br>68.8 | 2,857 <sup>c</sup><br>30.0         | 15,100<br>68.9         | 2,529 <sup>c</sup><br>43.9         | 13,545<br>68.1         | 3,985 <sup>c</sup><br>33.9         | 12,282<br>67.3         | 2,724 <sup>c</sup><br>22.8         |
| <b>Other MI</b>               | 4,051<br>33.5         | 326 <sup>c</sup><br>14.0           | 1,851<br>31.1         | 229<br>9.7                         | 8,319 <sup>c</sup><br>31.2  | 839 <sup>c</sup><br>8.8            | 6,807<br>31.1          | 631 <sup>c</sup><br>11.0           | 6,357<br>31.9          | 1,020 <sup>c</sup><br>8.7          | 5,975<br>32.7          | 929 <sup>c</sup><br>7.8            |
| <b>SUD only</b>               | -                     | 842<br>36.1                        | -                     | 1,403<br>59.6                      | -                           | 5,830<br>61.2                      | -                      | 2,598<br>45.1                      | -                      | 6,741<br>57.4                      | -                      | 8,318<br>69.5                      |
| <b>CDPS score Mean (std)</b>  | 1.07<br>(0.64)        | 1.40 <sup>c</sup><br>(0.76)        | 1.00<br>(0.64)        | 1.15 <sup>c</sup><br>(0.73)        | 1.15<br>(0.67)              | 1.36 <sup>c</sup><br>(0.80)        | 1.14<br>(0.67)         | 1.42 <sup>c</sup><br>(0.78)        | 1.14<br>(0.67)         | 1.34 <sup>c</sup><br>(0.77)        | 0.96<br>(0.59)         | 0.99<br>(0.67)                     |

<sup>a</sup> = p < 0.05; <sup>b</sup> = p < 0.01; <sup>c</sup> = p < 0.001 comparing individuals with and without SUD (one statistic was calculated for equality among more than two groups).

MI = mental illness; SUD= Substance Use Disorder

**CDPS scores for two diagnostic subgroups of Medicaid beneficiaries in six states, by whether or not they had a co-occurring substance use disorder (SUD)**

**SEVERE MENTAL ILLNESS**

|                   | AR     |                   | CO     |                   | GA     |                   | IN     |                   | NJ     |                   | WA     |                   |
|-------------------|--------|-------------------|--------|-------------------|--------|-------------------|--------|-------------------|--------|-------------------|--------|-------------------|
|                   | No SUD | + SUD             |
| <b>CDPS score</b> | 1.17   | 1.66 <sup>c</sup> | 1.08   | 1.40 <sup>c</sup> | 1.26   | 1.71 <sup>c</sup> | 1.22   | 1.62 <sup>c</sup> | 1.26   | 1.69 <sup>c</sup> | 1.04   | 1.32 <sup>c</sup> |
| <b>Mean (std)</b> | (0.61) | (0.71)            | (0.65) | (0.71)            | (0.65) | (0.83)            | (0.67) | (0.75)            | (0.67) | (0.75)            | (0.60) | (0.72)            |

**OTHER MENTAL ILLNESS**

|                   |        |                   |        |                   |        |                   |        |                   |        |                   |        |                   |
|-------------------|--------|-------------------|--------|-------------------|--------|-------------------|--------|-------------------|--------|-------------------|--------|-------------------|
| <b>CDPS score</b> | 0.86   | 1.27 <sup>c</sup> | 0.82   | 1.12 <sup>c</sup> | 0.89   | 1.27 <sup>c</sup> | 0.95   | 1.32 <sup>c</sup> | 0.88   | 1.28 <sup>c</sup> | 0.79   | 1.03 <sup>c</sup> |
| <b>Mean (std)</b> | (0.64) | (0.80)            | (0.58) | (0.76)            | (0.63) | (0.75)            | (0.64) | (0.76)            | (0.62) | (0.79)            | (0.53) | (0.67)            |

**Supplemental Table 3 (with Ns and percentages): Use of psychiatric and general medical inpatient care by Medicaid beneficiaries with mental disorders in six states, by whether or not they had a co-occurring substance use disorder (SUD)**

|                                             | Arkansas |     | Colorado |     | Georgia |     | Indiana |     | New Jersey |     | Washington |     |          |    |         |    |          |    |         |    |         |    |       |    |
|---------------------------------------------|----------|-----|----------|-----|---------|-----|---------|-----|------------|-----|------------|-----|----------|----|---------|----|----------|----|---------|----|---------|----|-------|----|
|                                             | No       | Yes | No       | Yes | No      | Yes | No      | Yes | No         | Yes | No         | Yes |          |    |         |    |          |    |         |    |         |    |       |    |
| <b>Co-occurring substance use disorders</b> |          |     |          |     |         |     |         |     |            |     |            |     |          |    |         |    |          |    |         |    |         |    |       |    |
| <b>Severe MI</b>                            | N=8,028  |     | N=1,161  |     | N=4,097 |     | N=722   |     | N=18,361   |     | N=2,857    |     | N=15,100 |    | N=2,529 |    | N=13,545 |    | 3,985   |    | 12,282  |    | 2,274 |    |
| <b>Beh Dx</b>                               | n        | %   | n        | %   | n       | %   | n       | %   | n          | %   | n          | %   | n        | %  | n       | %  | n        | %  | n       | %  | n       | %  | n     | %  |
| <b>Medical Dx</b>                           | 770      | 10  | 494      | 43  | 73      | 2   | 203     | 28  | 1296       | 7   | 1101       | 38  | 1144     | 8  | 1016    | 40 | 1635     | 12 | 2118    | 53 | 552     | 5  | 676   | 25 |
|                                             | 1333     | 17  | 276      | 24  | 820     | 20  | 247     | 34  | 2933       | 16  | 836        | 29  | 2929     | 19 | 805     | 32 | 2260     | 17 | 1072    | 27 | 1587    | 13 | 756   | 28 |
| <b>Other MI</b>                             | N=4,051  |     | N=326    |     | N=1,851 |     | N=229   |     | N=8,319    |     | N=839      |     | N=6,807  |    | N=631   |    | N=6,357  |    | N=1,020 |    | N=5,975 |    | N=929 |    |
| <b>Beh Dx</b>                               | n        | %   | n        | %   | n       | %   | n       | %   | n          | %   | n          | %   | n        | %  | n       | %  | n        | %  | n       | %  | n       | %  | n     | %  |
| <b>Medical Dx</b>                           | 40       | 1   | 45       | 14  | 8       | 0   | 37      | 16  | 42         | 1   | 78         | 9   | 54       | 1  | 99      | 16 | 99       | 2  | 202     | 20 | 49      | 1  | 78    | 8  |
|                                             | 731      | 18  | 94       | 29  | 336     | 18  | 86      | 38  | 1556       | 19  | 317        | 38  | 1339     | 20 | 234     | 37 | 1131     | 18 | 297     | 29 | 739     | 12 | 239   | 26 |
| <b>Substance use disorders only</b>         | N=842    |     | N=1,403  |     | N=5,830 |     | N=2,598 |     | N=6,741    |     | N=8,318    |     |          |    |         |    |          |    |         |    |         |    |       |    |
| <b>Beh Dx</b>                               | n        | %   | n        | %   | n       | %   | n       | %   | n          | %   | n          | %   |          |    |         |    |          |    |         |    |         |    |       |    |
| <b>Medical Dx</b>                           | 63       | 7   | 68       | 5   | 191     | 3   | 139     | 5   | 802        | 12  | 186        | 2   |          |    |         |    |          |    |         |    |         |    |       |    |
|                                             | 382      | 45  | 668      | 48  | 2403    | 41  | 1203    | 46  | 2075       | 31  | 1715       | 21  |          |    |         |    |          |    |         |    |         |    |       |    |

<sup>1</sup> All differences between individuals with and without substance use disorders are significant, p<0.001

Beh Dx= inpatient utilization with a primary behavioral health diagnosis; Medical Dx = inpatient utilization with a primary medical care diagnosis; MI = mental illness

**Supplemental Table 4: Multiple regression analyses (log-linear models) omitting CDPS scores)**

|                                       | Arkansas<br>N=14,408 |                  | Colorado<br>N=8,302 |                  | Georgia<br>N=36,206 |                  | Indiana<br>N=27,665 |                  | New Jersey<br>N=31,648 |                  | Washington<br>N=30,228 |                  |
|---------------------------------------|----------------------|------------------|---------------------|------------------|---------------------|------------------|---------------------|------------------|------------------------|------------------|------------------------|------------------|
|                                       | Estimate             | Std error        | Estimate            | Std error        | Estimate            | Std error        | Estimate            | Std error        | Estimate               | Std error        | Estimate               | Std error        |
| <b>Behavioral health expenditures</b> |                      |                  |                     |                  |                     |                  |                     |                  |                        |                  |                        |                  |
| Intercept                             | 4.13                 | .09 <sup>c</sup> | 4.12                | .11 <sup>c</sup> | 4.00                | .05 <sup>c</sup> | 3.81                | .06 <sup>c</sup> | 4.35                   | .06 <sup>c</sup> | 4.12                   | .05 <sup>c</sup> |
| Substance use                         | .45                  | .04 <sup>c</sup> | .57                 | .05 <sup>c</sup> | .69                 | .02 <sup>c</sup> | .67                 | .02 <sup>c</sup> | 1.09                   | .02 <sup>c</sup> | .86                    | .02 <sup>c</sup> |
| Age                                   | .00                  | .00              | .00                 | .00              | .00                 | .00 <sup>b</sup> | .00                 | .00 <sup>c</sup> | -.01                   | .00 <sup>c</sup> | -.01                   | .00 <sup>c</sup> |
| Severe MI                             | 1.53                 | .03 <sup>c</sup> | .88                 | .04 <sup>c</sup> | 1.27                | .02 <sup>c</sup> | 1.18                | .02 <sup>c</sup> | 1.34                   | .02 <sup>c</sup> | 1.04                   | .02 <sup>c</sup> |
| Female                                | -.26                 | .03 <sup>c</sup> | -.08                | .04              | .00                 | .02              | -.16                | .02 <sup>c</sup> | -.17                   | .02 <sup>c</sup> | .01                    | .02              |
| Non-minority                          | -.06                 | .03              | .40                 | .04 <sup>c</sup> | .17                 | .02 <sup>c</sup> | .22                 | .02 <sup>c</sup> | .11                    | .02 <sup>c</sup> | .24                    | .02 <sup>c</sup> |
| Disabled                              | .85                  | .04 <sup>c</sup> | .83                 | .05 <sup>c</sup> | .70                 | .02 <sup>c</sup> | 1.15                | .02 <sup>c</sup> | .65                    | .03 <sup>c</sup> | .91                    | .02 <sup>c</sup> |
| <b>Medical expenditures</b>           |                      |                  |                     |                  |                     |                  |                     |                  |                        |                  |                        |                  |
| Intercept                             | 3.80                 | .08 <sup>c</sup> | 6.21                | .08 <sup>c</sup> | 4.76                | .05 <sup>c</sup> | 4.66                | .05 <sup>c</sup> | 5.25                   | .05 <sup>c</sup> | 5.11                   | .05 <sup>c</sup> |
| Substance use                         | .28                  | .04 <sup>c</sup> | .26                 | .03 <sup>c</sup> | .51                 | .02 <sup>c</sup> | .44                 | .02 <sup>c</sup> | .34                    | .02 <sup>c</sup> | .45                    | .02 <sup>c</sup> |
| Age                                   | .02                  | .00 <sup>c</sup> | .00                 | .00              | .03                 | .00 <sup>c</sup> | .02                 | .00 <sup>c</sup> | .02                    | .00 <sup>c</sup> | .02                    | .00 <sup>c</sup> |
| Severe MI                             | -.43                 | .03 <sup>c</sup> | -.24                | .03 <sup>c</sup> | -.21                | .02 <sup>c</sup> | -.21                | .02 <sup>c</sup> | -.25                   | .02 <sup>c</sup> | -.09                   | .02 <sup>c</sup> |
| Female                                | .37                  | .03 <sup>c</sup> | .06                 | .03              | .40                 | .02 <sup>c</sup> | .25                 | .02 <sup>c</sup> | .25                    | .02 <sup>c</sup> | .52                    | .02 <sup>c</sup> |
| Non-minority                          | .35                  | .03 <sup>c</sup> | .10                 | .03 <sup>c</sup> | .34                 | .02 <sup>c</sup> | .22                 | .02 <sup>c</sup> | -.11                   | .02 <sup>c</sup> | .00                    | .02              |
| Disabled                              | .08                  | .04              | 1.02                | .04 <sup>c</sup> | .22                 | .02 <sup>c</sup> | .13                 | .02 <sup>c</sup> | -.09                   | .02 <sup>c</sup> | .00                    | .02              |

<sup>a</sup> = p < 0.05; <sup>b</sup> = p < 0.01; <sup>c</sup> = p < 0.001

MI = Mental Illness; Disabled = qualified for Medicaid due to a disabling condition
